# Supplementary material
Source: MDPI journal article supplement (https://www.mdpi.com/2311-5637/8/7/307)
Supplement: s1 [file s1]

## Supplementary data

**Figure S1.** SDS PAGE showing purification of recombinant serratiopeptidase using 2M and 7M urea. Lane 1 and 3—solubilized inclusion bodies using 2M urea; lanes 2 and 4—solubilized inclusion bodies using 7M urea; M—marker; lanes E1 and E3—purified recombinant serratiopeptidase using 2M urea; and lanes E2 and E4—purified recombinant serratiopeptidase using 7M urea.

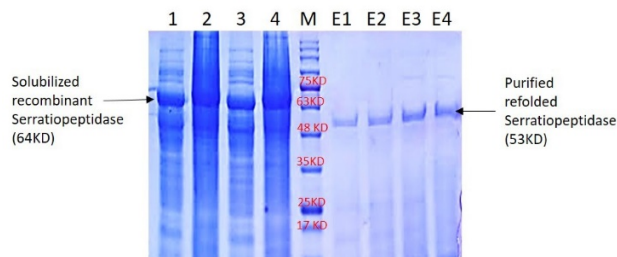

**Figure S2.** SDS PAGE of different supplements tried for enhancing solubilization of recombinant serratiopeptidase.

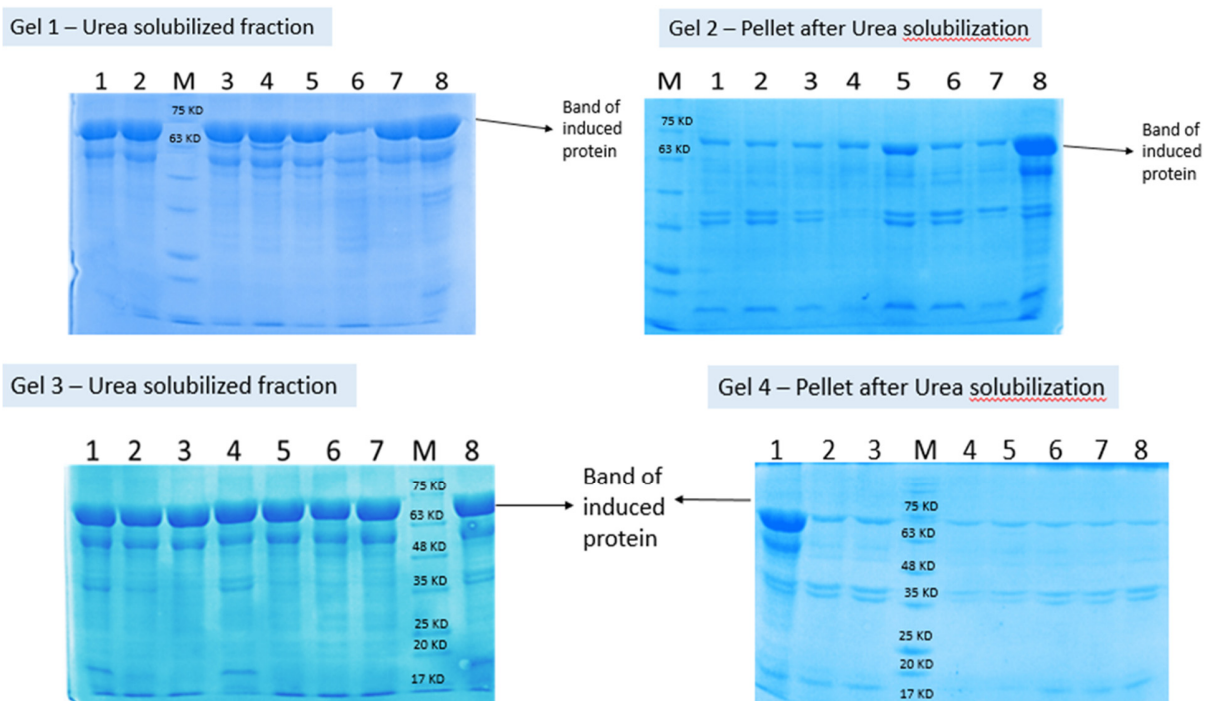

**Annotation (Gel 1):**

1. IB pellet subjected to solubilization
  2. Buffer containing 2M urea, pH 9
  3. Buffer containing 2M urea, pH 10
  4. Buffer containing 2M urea, pH 11
  5. Buffer containing 2M urea, pH 12
  6. Buffer containing 2M urea, pH 6
  7. Buffer containing 2M urea and 0.5% SDS, pH 8
  8. Buffer containing 2M urea and 1% SDS, pH 8
- M - Marker

**Annotation (Gel 2):**

M—Marker

1. Buffer containing 2M urea, pH 9M
2. Buffer containing 2M urea, pH 10
3. Buffer containing 2M urea, pH 11
4. Buffer containing 2M urea, pH 12
5. Buffer containing 2M urea, pH 6
6. Buffer containing 2M urea and 0.5% SDS, pH 8
7. Buffer containing 2M urea and 1% SDS, pH 8
8. IB pellet subjected to solubilization

**Annotation (Gel 3):**

1. IB pellet subjected to solubilization
  2. Buffer containing 2M urea, pH 8, freeze thaw
  3. Buffer containing 2M urea, pH 8
  4. Buffer containing 3M urea, pH 8
  5. Buffer containing 4M urea, pH 8
  6. Buffer containing 5M urea, pH 8
  7. Buffer containing 6M urea, pH 8
  8. Buffer containing 7M urea, pH 8
- M—Marker

**Annotation (Gel 4):**

1. IB pellet subjected to solubilization
  2. Buffer containing 2M urea, pH 8, freeze thaw
  3. Buffer containing 2M urea, pH 8
  4. Buffer containing 3M urea, pH 8
  5. Buffer containing 4M urea, pH 8
  6. Buffer containing 5M urea, pH 8
  7. Buffer containing 6M urea, pH 8
  8. Buffer containing 7M urea, pH 8
- M—Marker

**Figure S3. A** MASCOT score histogram of purified recombinant serratiopeptidase; **B** MASCOT database hit confirming the purified protein to be recombinant serratiopeptidase.

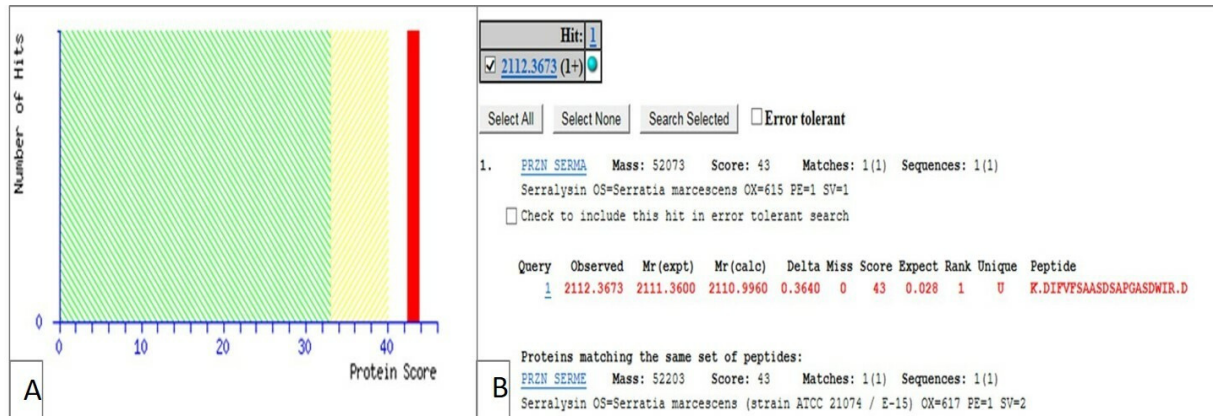

Sequence 1—serratiopeptidase fusion protein (Molecular weight: 65.574 kD)

MGSSHHHHHGSGLVPRGSASMSDSEVNQEAKPEVKPEVKPETHINLKVSDGSSEIFFKI  
 KKTTPRLRLMEAFKRQKGEMDSLRLFLYDGIQADQTPEDLDMEDNDIIEAHREQIGG  
 MQSTKKAIEITESSLAATTGYDAVDDLLHYHERGNGIQINGKDSFSNEQAGLFITRENQ  
 TWNGYKVFQGPVKLTFSFPDYKFSSTNVAGDTGLSKFSAEQQQQAKLSLQSWADVANI  
 TFTEVAAGQKANITFGNYSQDRPGHYDYGTQAYAFNPNTIWQGGQDLGGQTWYNVNQS  
 NVKHPATEDYGRQTFTHEIGHALGLSHPGDYNAGEGNPTYRDVTYAEDTRQFSLMSYW  
 SETNTGGDNGGHYAAAPLLDDIAAIQHLYGANLSTRTGDTVYGFNSNTGRDFLSTTSNS  
 QKVIFAAWDAGGNDTFDFSGYTANQRINLNEKSFSQSDVGGLKGNVSIAAGVTIENAIGGS  
 GNDVIVGNAANNVLKGGAGNDVLFGGGGADELWGGAGKDIFVFAASDSAPGASDWI  
 RDFQKGIDKIDLSFFNKEAQSSDFIHFVDHFSGTAGEALLSYNASSNVTDL SVNIGGHQA  
 PDFLVKIVGQVDVATDFIV

Sequence 2—purified mature serratiopeptidase (Molecular weight: 50.458kD)

AATTGYDAVDDLLHYHERGNGIQINGKDSFSNEQAGLFITRENQ TWNGYKVFQGPVKL  
 TFSFPDYKFSSTNVAGDTGLSKFSAEQQQQAKLSLQSWADVANITFTEVAAGQKANITF  
 GNYSQDRPGHYDYGTQAYAFNPNTIWQGGQDLGGQTWYNVNQSNVKHPATEDYGRQT  
 FTHEIGHALGLSHPGDYNAGEGNPTYRDVTYAEDTRQFSLMSYWSSETNTGGDNGGHYA  
 AAPLLDDIAAIQHLYGANLSTRTGDTVYGFNSNTGRDFLSTTSNSQKVIFAAWDAGGND  
 TDFSGYTANQRINLNEKSFSQSDVGGLKGNVSIAAGVTIENAIGGS GNDVIVGNAANNVL

KGAGNDVLFGGGGADELWGGAGKDIFVFSAA SDSAPGASDWIRDFQKGIDKIDLSFF  
NKEAQSSDFIHFVDHFSGTAGEALLSYNASSNVTDL SVNIGGHQAPDFLVKIVGQVDVA  
TDFIV
